1           **Lithium-induced ciliary lengthening sparks Arp2/3 complex-dependent endocytosis**

2

3

<sup>1</sup>Brae M Bigge, Prachee Avasthi\*

4

5 <sup>1</sup>Biochemistry and Cell Biology, Geisel School of Medicine, Dartmouth College, Hanover, NH

6 \*Address correspondence to [prachee.avasthi@dartmouth.edu](mailto:prachee.avasthi@dartmouth.edu)

7

8

9

10 **ABSTRACT**

11

12 Ciliary length is highly regulated across cell types, but this tight regulation can be disrupted by  
13 lithium, which causes ciliary elongation across cell types and organisms. Here, we use the  
14 powerful ciliary model *Chlamydomonas reinhardtii* to investigate the mechanism behind  
15 lithium-induced ciliary elongation. Protein synthesis is not required for lengthening, and the  
16 target of lithium is GSK3, which has substrates that can influence membrane dynamics. Further,  
17 in addition to elongation of the microtubule core, ciliary assembly requires a supply of ciliary  
18 membrane. To test if the membrane for ciliary lengthening could be from the Golgi or the cell  
19 body plasma membrane, we treated cells with either Brefeldin A or Dynasore respectively. Cilia  
20 were able to elongate normally with Brefeldin treatment, but Dynasore treatment resulted in  
21 defective lengthening. Genetic or acute chemical perturbation of the Arp2/3 complex, which is  
22 required for endocytosis in these cells, blocks lithium-induced ciliary lengthening. Finally, we  
23 looked at filamentous actin in lithium-treated cells and found an increase in Arp2/3 complex-  
24 and endocytosis-dependent puncta near the base of cilia. Blocking endocytosis by inhibiting the  
25 Arp2/3 complex or dynamin, confirmed by visual loss of endocytic structures, prevents lithium-  
26 induced ciliary elongation. We previously reported that endocytosis was required for early  
27 ciliary assembly from zero length, and here, we demonstrate that endocytosis is also required  
28 for ciliary elongation from steady state length. Thus, we hypothesize that lithium-induced ciliary  
29 elongation occurs through a mechanism that involves a supply of additional ciliary membrane  
30 through endocytosis.

31

## 32 INTRODUCTION

33 The plasma membrane-ensheathed, microtubule-based cilium is important for signaling  
34 and motility, and defects in this organelle can lead to a large number of diseases termed  
35 ciliopathies (Reiter and Leroux 2017). Thus, ciliary length is tightly regulated across cell types.  
36 However, the mechanisms by which such regulation occurs are still being investigated. Many  
37 studies have focused on perturbations that result in shorter cilia, but the relatively infrequent  
38 examples of ciliary lengthening can hold the keys to uncovering regulatory mechanisms.

39 An example of a perturbation that increases ciliary length is lithium. The ciliary  
40 elongation elicited by lithium treatment is ubiquitous across cell types, occurring in  
41 *Chlamydomonas* (Nakamura, Takino, and Kojima 1987; Wilson and Lefebvre 2004),  
42 chondrocytes (Soave et al. 2022; Thompson et al. 2016), ependymal cells (Kong et al. 2015),  
43 human fibroblast-like synoviocytes (Ou et al. 2009), fibroblasts (Ou et al. 2012), mouse brains  
44 (Miyoshi et al. 2009), NIH3T3 cells (Miyoshi et al. 2009), human induced pluripotent stem cell-  
45 derived neurons (Miki et al. 2019), Sertoli cells from pig testes (Ou et al. 2014), and others.  
46 Lithium is thought to target GSK3 (Wilson and Lefebvre 2004), but the mechanism by which this  
47 causes ciliary elongation are relatively unknown.

48 Much of what we know about ciliary length regulation comes from studies in the  
49 unicellular green algae *Chlamydomonas reinhardtii*. *Chlamydomonas* serves as a powerful  
50 model for studying length regulation and assembly of cilia as it has two persistent and  
51 symmetric cilia that are structurally and mechanistically similar to the cilia of mammalian cells.  
52 The cilia of *Chlamydomonas* can be easily severed and regrown in a matter of hours which  
53 allows for dissection of the complex processes involved in ciliary assembly and regulation (Jack  
54 and Avasthi 2018; Rosenbaum, Moulder, and Ringo 1969; Paul A. Lefebvre 1995; P. A. Lefebvre  
55 et al. 1978). Further, genetic mutants for *Chlamydomonas* exist for 83% of the nuclear genome  
56 (Li et al. 2019; Cheng et al. 2017). These mutants can be used to identify important genes  
57 required for ciliary length regulation. For example, short flagella mutants (JARVIK et al. 1984, 1)  
58 and long flagella mutants (Barsel, Wexler, and Lefebvre 1988; Asleson and Lefebvre 1998;  
59 Nguyen, Tam, and Lefebvre 2005, 1; L.-W. Tam, Wilson, and Lefebvre 2007) have been used to  
60 help researchers better understand the mechanisms involved in maintaining ciliary length.

61 Using *Chlamydomonas* several models for ciliary length regulation have been proposed  
62 (Ludington et al. 2015; Avasthi and Marshall 2012; Ishikawa and Marshall 2017a; Marshall  
63 2015), including the limiting-precursor model (Rosenbaum, Moulder, and Ringo 1969), a few  
64 diffusion-based models (Levy 1974; Ludington et al. 2015; Hendel, Thomson, and Marshall  
65 2018), the molecular ruler model (Marshall 2015), the time-of-flight model (Ishikawa and  
66 Marshall 2017b), the mechanosensitive ion channel model (Besschetnova et al. 2010; Beck and  
67 Uhl 1994), the swim speed feedback model (D. Tam and Hosoi 2011; Osterman and Vilfan  
68 2011), and the balance point model (Marshall and Rosenbaum 2001; Marshall et al. 2005). The  
69 bulk of what we know regarding ciliary length regulation is related to the availability or  
70 turnover of protein, generally tubulin, but cilia are not merely composed of proteins. They are  
71 also ensheathed in plasma membrane. This leads to questions about whether membrane could  
72 be limiting. In fact, when cells are treated with Brefeldin A to collapse the Golgi and prevent the  
73 delivery of Golgi-derived membrane, cilia shorten (Dentler 2013). Further, data suggest that the  
74 Arp2/3 complex and actin are involved in reclamation of membrane from the cell body plasma  
75 membrane that is required for normal ciliary assembly (Bigge et al. 2020).

76 Because lithium causes ciliary lengthening across a broad range of cells and organisms,  
77 we use it as a powerful tool to investigate the mechanisms that result in ciliary elongation in  
78 *Chlamydomonas* and beyond. We investigate the trafficking mechanisms that deliver the excess  
79 membrane required for additional growth past steady state length and find that endocytosis is  
80 important for ciliary elongation induced by lithium. Further, using both chemical inhibitors and  
81 genetic mutants, we find a role for Arp2/3 complex-mediated actin networks in ciliary  
82 lengthening induced by lithium. Altogether, we propose a new model where the additional  
83 membrane required for lithium-induced ciliary lengthening is endocytosed in an Arp2/3  
84 complex-dependent manner.

85

## 86 RESULTS

### 87 Inhibition of GSK3 by many mechanisms results in ciliary elongation

88 It has been proposed that lithium targets GSK3 in *Chlamydomonas* (Wilson and Lefebvre  
89 2004). We questioned whether inhibition of GSK3 was directly responsible for ciliary elongation  
90 seen with lithium. To answer this, we turned to other GSK3 inhibitors. Three classes of GSK3  
91 inhibitors exist: metal cations that interfere with ATP binding, ATP competitive inhibitors, and  
92 non-ATP competitive inhibitors. Lithium is thought to inhibit GSK3 by competing with  
93 magnesium ions required for ATP binding and by phosphorylation. To confirm that GSK3  
94 inhibition is the cause of ciliary elongation caused by lithium, we employed inhibitors from each  
95 of the other two classes. We used CHIR99021 and (2'Z,3'E)-6-Bromoindirubin-3'-oxime (6-BIO)  
96 as ATP competitive inhibitors and Tideglusib as a non-ATP competitive inhibitor.

97 Consistent with previous results, treatment with LiCl induces ciliary elongation through  
98 either interference with ATP binding or through phosphorylation of GSK3 (**Figure 1A**). The ATP  
99 competitive inhibitor CHIR99021 has been shown to modestly elongate cilia in foreskin  
100 fibroblasts (Ou et al. 2012). We confirmed that in *Chlamydomonas* 100  $\mu$ M CHIR99021 also  
101 results in an increase in ciliary length (**Figure 1B**). Next, we looked at the competitive inhibitor  
102 6-BiO. Although 2  $\mu$ M 6-BiO has been used in *Chlamydomonas* and caused ciliary shortening  
103 (Kong et al. 2015), when we treated cells with 100 nM 6-BIO, we observed ciliary elongation  
104 (**Figure 1C**). Finally, we looked a non-competitive inhibitor of GSK3, Tideglusib, for which the  
105 effects on cilia have not been previously observed. When cells were treated with 20  $\mu$ M of  
106 Tideglusib, we saw an increase in ciliary length consistent with other methods of GSK3  
107 inhibition (**Figure 1D**). While each inhibitor may have its own set of of-targets, they all share a  
108 unique on-target of GSK3, lending further support to GSK3 being the cilium length relevant  
109 target of GSK3. This also suggests that the method of inhibition of GSK3 is not important for  
110 ciliary lengthening. Whether GSK3 was inhibited via competition for ATP binding or  
111 phosphorylation, cilia were able to elongate.

112

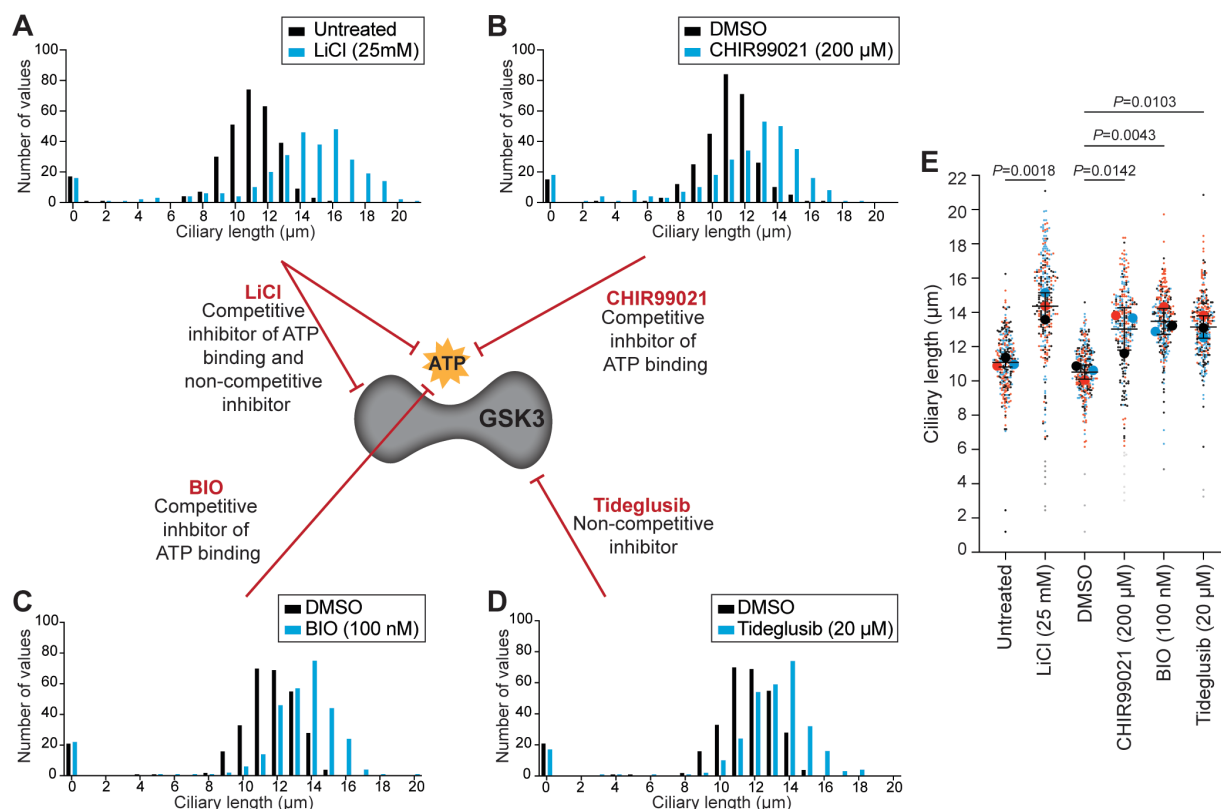

113  
 114 **Figure 1. Inhibition of GSK3 through multiple mechanisms results in ciliary elongation.** A-D) Wild-type (CC-  
 115 5325) cells were treated with GSK3 inhibitors including 25 mM LiCl (A), 200 μM CHIR99021 (B), 20 μM  
 116 Tideglusib (C), or 100 nM BIO (D) for 90 minutes. Histograms show distribution of ciliary lengths. n=100 cells  
 117 in 3 separate biological replicates. E) Dot plot representing the data in A-D excluding zero length cilia. Each  
 118 color represents a separate biological replicate where n=100. The large dots represent means from each  
 119 replicate and the mean (solid lines), standard deviation (error bars), and statistical analyses were calculated  
 120 using those means. P values shown on the plot are the results of a one-way ANOVA followed by Tukey's  
 121 multiple comparisons analysis.

122

### 123 Membrane for lithium-induced ciliary elongation comes from endocytosis

124 To better understand the mechanism behind ciliary elongation induced by GSK3  
 125 inhibition, we looked at the source of the ciliary material. The cilium is primarily composed of  
 126 the microtubule-based axoneme and the membrane surrounding the organelle. Thus, for the  
 127 rapid growth seen with lithium, the cell needs to deliver not only protein, but also membrane  
 128 to the cilia during a relatively short time frame. Treatment of cells with lithium and  
 129 cycloheximide, which blocks protein synthesis, resulted in normally elongating cilia, suggesting  
 130 that new protein synthesis is not required for lithium-induced ciliary elongation and the protein  
 131 required for assembly must come from a pool somewhere in the cell (Wilson and Lefebvre  
 132 2004) (**Supplemental Figure 1**).

133 The membrane required for ciliary elongation induced by lithium must come from one  
 134 of two sources: the Golgi, which is generally thought to be the main source of ciliary membrane  
 135 (Nachury, Seeley, and Jin 2010; Rohatgi and Snell 2010), or a pool in the cell body plasma  
 136 membrane (Bigge et al. 2020). To differentiate between these two possibilities, we treated cells  
 137 with either Brefeldin A (BFA), a drug that causes Golgi collapse, or Dynasore, a drug that

138 interferes with dynamin-mediated endocytosis. When cells were treated with BFA to block  
139 membrane delivery from the Golgi, cilia were still able to elongate normally in LiCl (**Figure 2A-**  
140 **B**). This suggests that membrane from the Golgi is not required for lithium-induced elongation.

141 Conversely, when treated with Dynasore to inhibit endocytosis, ciliary elongation was  
142 defective (**Figure 3A-B**), implying endocytosis is required for lithium-induced elongation and  
143 that endocytosis requires dynamin. To further probe the involvement of endocytosis in ciliary  
144 elongation, we turned to the dynamin family. GSK has been previously shown to target the  
145 dynamin protein family; in neuronal and non-neuronal mammalian cells dynamin 1 is usually  
146 inactive due to phosphorylation by GSK3 $\beta$ , but when cells are treated with CHIR99021 to inhibit  
147 GSK3, dynamin 1 is dephosphorylated and endocytosis rates increase significantly (Srinivasan et  
148 al. 2018; Smillie and Cousin 2012). Meanwhile, GSK3 $\alpha$  has been found to phosphorylate  
149 mammalian Dynamin 2 (Laiman et al. 2021).

150 Canonical dynamins have not been identified in *Chlamydomonas*, but the genome  
151 contains many dynamin related proteins (DRPs). DRPs differ from dynamins in that they do not  
152 contain all 5 traditional dynamin domains: A GTPase domain, a middle domain, a pleckstrin  
153 homology domain, a guanine exchange domain, and a proline rich domain (Elde et al. 2005)  
154 (**Supplemental Figure 2**). *Chlamydomonas* contains 9 DRPs with similarity to a canonical  
155 dynamin (DRP1-9). The DRP with the highest similarity to canonical dynamin is DRP3  
156 (**Supplemental Figure 2**). To determine if GSK3 could be a potential kinase for this protein, we  
157 employed ScanSite4.0, which confirmed that of the 9 DRPs of *Chlamydomonas*, the only one  
158 with a traditional GSK3 target sequence was DRPs (**Supplemental Figure 2**).

159 To investigate whether DRP3 might be involved in the ciliary elongation that results  
160 from lithium treatment, we obtained a mutant from the *Chlamydomonas* mutant library (CLiP)  
161 (Cheng et al. 2017; Li et al. 2019). This mutant has a cassette inserted early in the gene. When  
162 we treated these cells with lithium, ciliary elongation was decreased (**Figure 3C-D**), suggesting  
163 that this DRP3 is involved in the ciliary response to GSK3 inhibition. Elongation was not fully  
164 blocked by this mutation in DRP3, this is potentially due to the presence of other DRPs that  
165 might compensate for the lost function of DRP3.

166

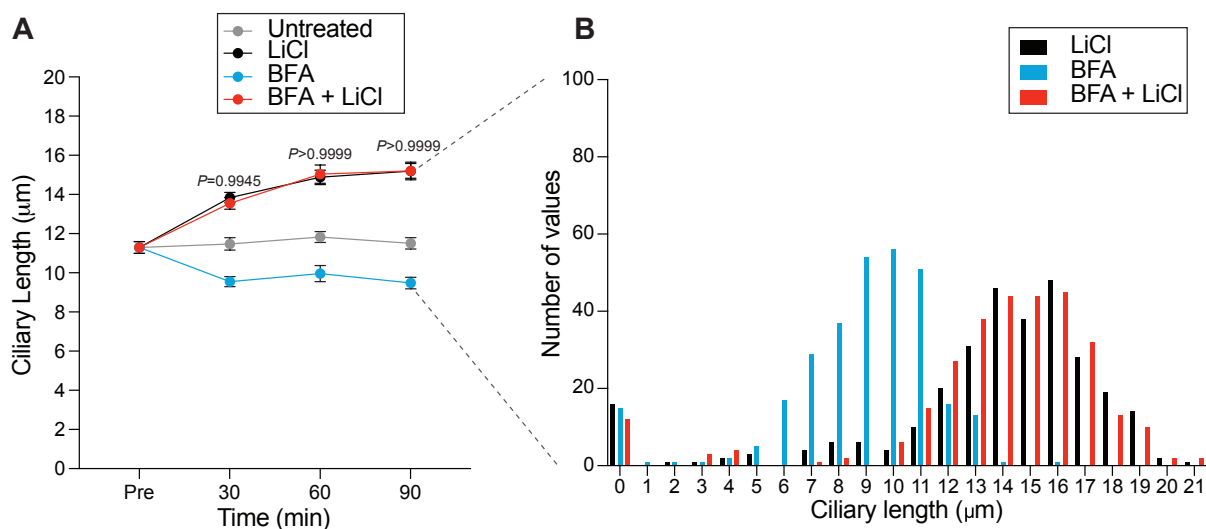

167

168 **Figure 2. Golgi-derived membrane is not required for lithium-induced ciliary elongation.** **A)** Wild-type (CC-  
 169 5325) cells were treated with 36  $\mu$ M Brefeldin A or 36  $\mu$ M Brefeldin A with 25 mM LiCl. n=30 cells per time  
 170 point and sample in 3 separate biological replicates. Significance was determined using a two-way ANOVA  
 171 with a Tukey's multiple comparisons test. Values above the lines show the comparison between LiCl and BFA  
 172 with LiCl. Each time point is ns at the p-values listed on the graph. Additionally, cells treated with BFA  
 173 alone have significantly ( $p < 0.0001$ ) shorter cilia than untreated cells, confirming function of BFA. **B)** The 90-minute  
 174 time point from (A) was expanded to n=100 cells for each biological replicate. The histograms show  
 175 distribution of ciliary lengths.  
 176

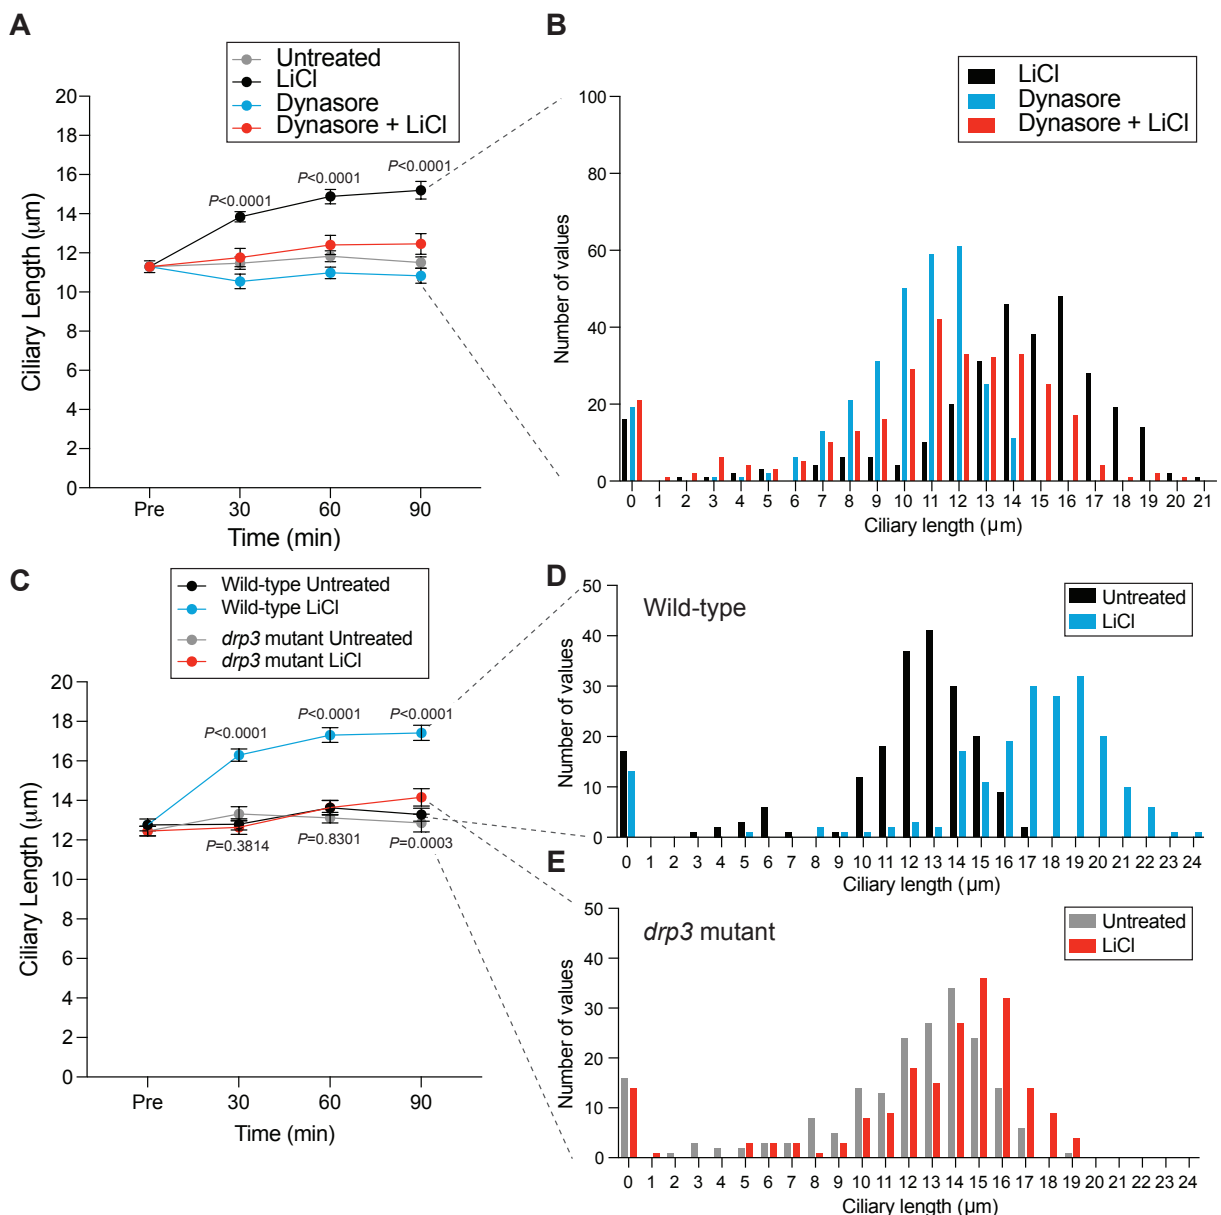

177 **Figure 3. Lithium-induced ciliary elongation requires endocytosis.** **A)** Wild-type (CC-5325) cells were treated  
 178 with 100  $\mu$ M Dynasore or 100  $\mu$ M Dynasore with 25 mM LiCl. n=30 cells per time point and sample in 3  
 179 separate biological replicates. Significance was determined by two-way ANOVA with a Tukey's multiple  
 180 comparisons test. P values on the graph are comparing LiCl treated cells to cells treated with LiCl and  
 181 Dynasore. Each time point is significantly different (\*\*\*\*). **B)** The 90-minute time point from (A) was  
 182

183 expanded to n=100 cells for each biological replicate. The histograms show distribution of ciliary lengths. **C)**  
184 Wild-type (CC-5325) cells and *drp3* mutant cells were treated with 25 mM LiCl. n=30 cells per time point and  
185 sample in 2 separate biological replicates. Significance was determined by two-way ANOVA with a Tukey's  
186 multiple comparisons test. P values on the graph are comparing Wild-type cells treated with LiCl to *drp3*  
187 mutant cells treated with LiCl. Each time point is significantly different (\*\*\*\*). Additionally, the P values  
188 below the line compare untreated *drp3* mutant cells with LiCl-treated *drp3* mutant cells. The 30- and 60-  
189 minute time point are not significantly different, by the 90-minute time point is (\*\*\*). **D-E)** The 90-minute  
190 time points from (D) were expanded to n=100 cells for each biological replicate. (D) represents wild-type cells  
191 and (E) represents *drp3* mutant cells. The histograms show distribution of ciliary lengths.

192

### 193 **Lithium-induced ciliary elongation promotes formation of filamentous actin puncta**

194 The high demand for new membrane and protein for ciliary elongation led us to  
195 hypothesize that treatment with GSK3 inhibitors would lead to an increase in actin dynamics.  
196 Previously, we found that upon deciliation and rapid initial ciliary assembly, filamentous actin  
197 puncta visualized with phalloidin and dependent on the Arp2/3 complex form at the apex of the  
198 cell near the cell body plasma membrane (Bigge et al. 2020). These puncta are reminiscent of  
199 endocytic pits seen in yeast and require the Arp2/3 complex, which is known to be involved in  
200 endocytosis in cells with cell walls, like yeast and *Chlamydomonas* (Bigge et al. 2020; Basu,  
201 Munteanu, and Chang 2014; Aghamohammadzadeh and Ayscough 2009; Carlsson and Bayly  
202 2014). Thus, we phalloidin stained cells to visualize filamentous actin and these punctate  
203 structures in cells treated with GSK3 inhibitors. Untreated cells formed some puncta at the apex  
204 of the cell (**Figure 4A**), but treatment with either lithium (LiCl), CHIR99021, 6-BIO, or Tideglusib  
205 increased the percentage of cells with dots and the number of dots per cell (**Figure 4A-B**). *arpc4*  
206 mutant cells never form dots confirming that the formation of these actin puncta is Arp2/3-  
207 dependent (**Figure 4A**). The increased formation of these Arp2/3 complex-dependent  
208 filamentous actin puncta suggests a burst of endocytosis triggered by inhibition of GSK3  
209 occurring during times of rapid ciliary elongation.

210 To further investigate the increase in actin puncta, we employed an mNeonGreen-  
211 tagged Lifeact peptide, which labels filamentous actin populations in live cells. Using this  
212 method, we were able to visualize dynamic actin and puncta in both untreated and lithium-  
213 treated wild-type cells (**Figure 5A, Supplemental Videos 1-2**). Then using the ImageJ/FIJI Plugin  
214 Trackmate, we tracked the movement of filamentous actin accumulations within the cell  
215 (Ershov et al. 2021; Tinevez et al. 2017). We found that actin dynamics were significantly  
216 increased in wild-type cells treated with lithium compared with untreated cells (**Figure 5B-C**).  
217 The increased actin dynamics in lithium-treated cells were particularly enriched near the  
218 membrane.

219



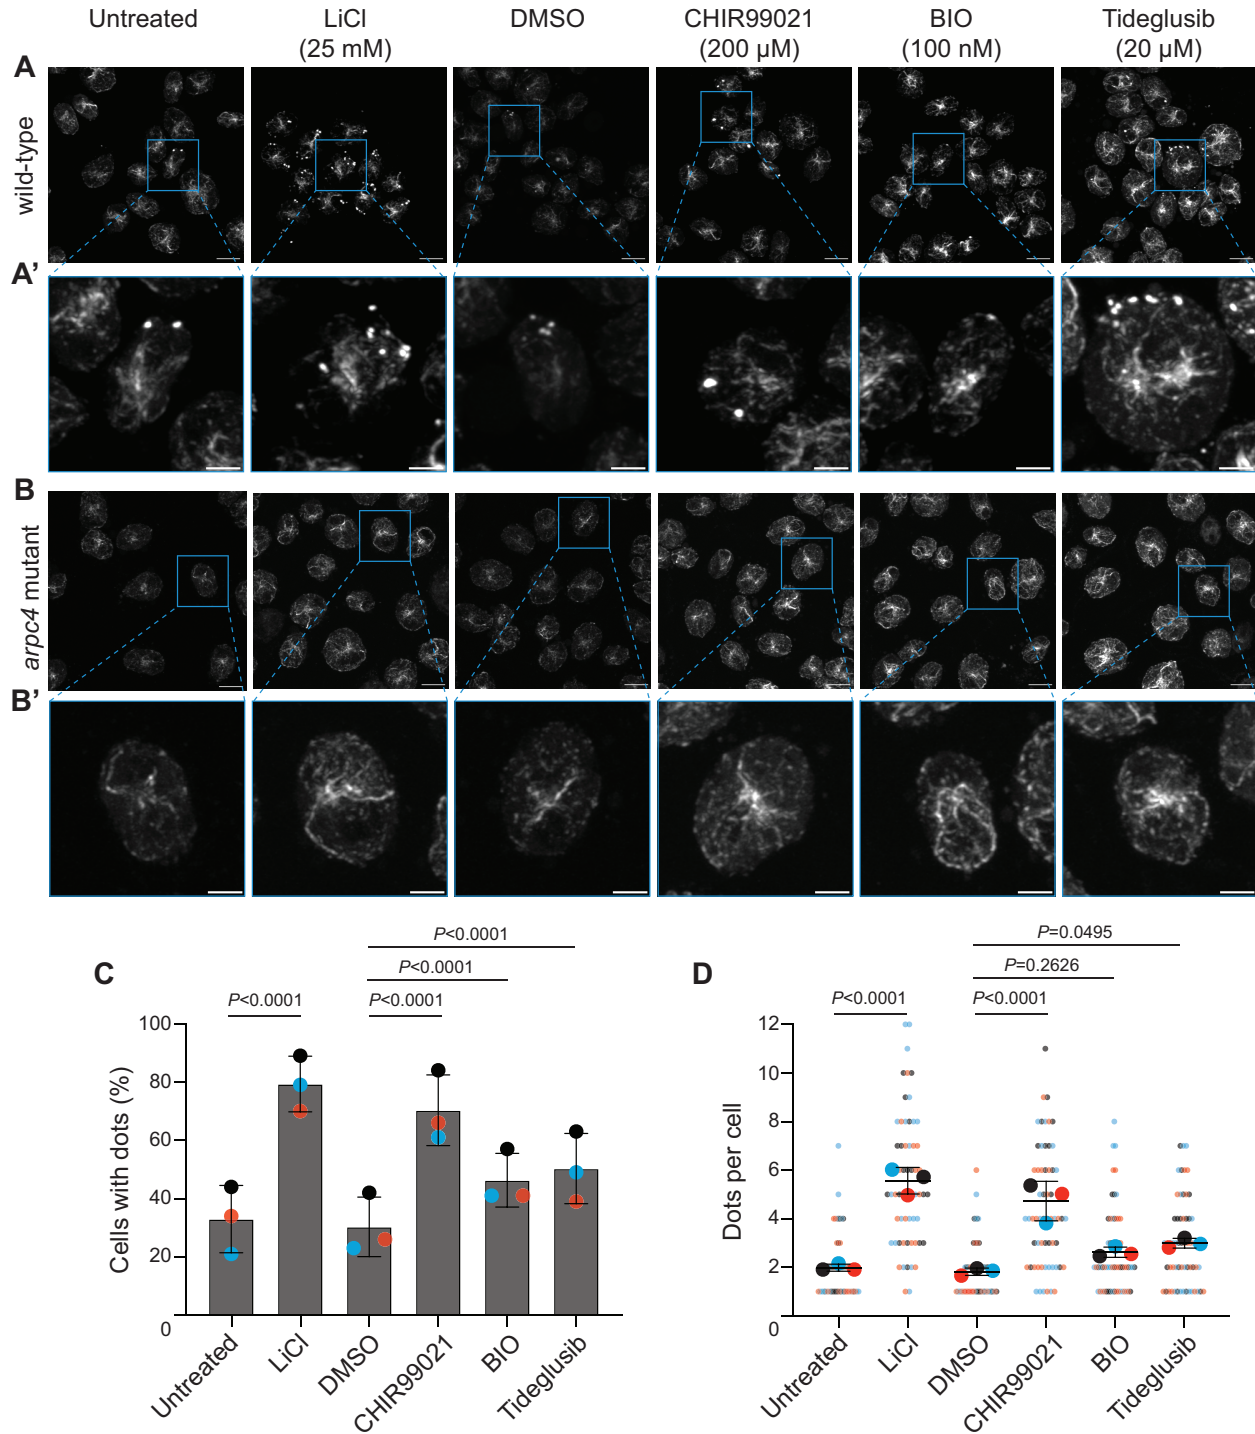

220  
221  
222  
223  
224  
225  
226  
227  
228

**Figure 4. GSK3 inhibition increases Arp2/3 complex-dependent filamentous actin puncta. A)** Maximum intensity projections of z stacks taken of wild-type cells treated with either nothing, LiCl (25 mM), DMSO, CHIR99021 (200  $\mu$ M), BIO (100  $\mu$ M), or Tideglusib (20  $\mu$ M) and stained with phalloidin to visualize filamentous actin. Scale bars represent 5  $\mu$ m. **A')** Zoomed in images of the boxed cells in A. **B)** Maximum intensity projections of z stacks taken of *arpc4* mutant cells treated with either nothing, LiCl (25 mM), DMSO, CHIR99021 (200  $\mu$ M), BIO (100  $\mu$ M), or Tideglusib (20  $\mu$ M) and stained with phalloidin to visualize filamentous actin. Scale bars represent 5  $\mu$ m. **B')** Zoomed in images of the boxed cells in B. **C)** Quantification of the percentage of cells with dots in either untreated, lithium treated, DMSO treated, CHIR99021 treated,

229 BIO treated, or Tideglusib treated samples. n=100 in 3 separate biological replicates. Significance was  
230 determined using Chi Square analysis and Fisher's exact tests. **D)** Quantification of the number of dots per  
231 cell in cells treated with either DMSO, CHIR99021, BIO, or Tideglusib at the specified concentrations. n=20  
232 cell in 3 separate biological replicates. Significance was determined using a one-way ANOVA and a Tukey's  
233 multiple comparisons test.  
234

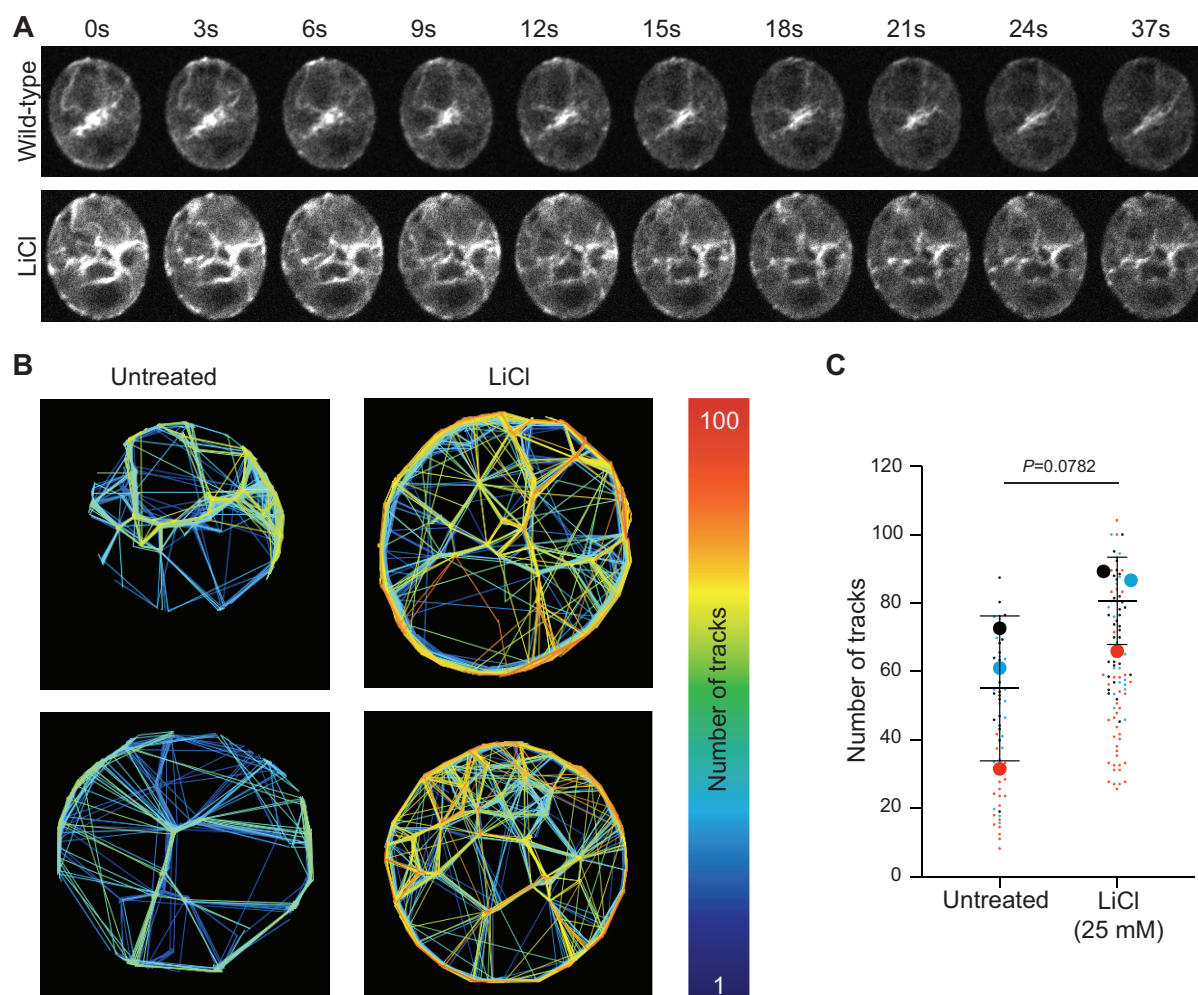

235  
236 **Figure 5. Actin dynamics increase near the membrane during lithium-induced ciliary elongation. A)** Time-  
237 lapse representation of videos taken of cells expressing Lifeact-mNeonGreen either untreated or treated with  
238 25 mM LiCl and then immediately imaged on a Nikon Spinning Disk microscope for 30 seconds. **B)** Videos  
239 represented in (A) were analyzed using the FIJI plugin, TrackMate. This identifies spots in videos and tracks  
240 their movement allowing us to measure actin dynamics. The tracks created in TrackMate were adjusted so  
241 that cells with less tracks will have more blue tracks, but cells with more tracks will start to have tracks with  
242 more oranges and reds according to the scale. **C)** From the TrackMate data, we found the number of tracks in  
243 untreated cells and cells treated with LiCl. Each color represents one of 3 separate biological replicates. The  
244 large dots represent the means from each biological replicate with the line and error bars showing the mean  
245 and standard deviation of the means from each replicate. Two-tailed t-test was performed on the means to  
246 give the p-value on the graph.

247  
248 **The Arp2/3 complex is required for lithium-induced ciliary elongation**

249           The increase in Arp2/3 complex-dependent actin puncta with lithium or GSK3 inhibition  
250 led us to question whether the Arp2/3 complex was required for ciliary elongation induced by  
251 lithium. Further, we previously showed that the Arp2/3 complex is required for rapid ciliary  
252 assembly in the initial stages of ciliogenesis (Bigge et al. 2020), leading us to hypothesize that  
253 the Arp2/3 complex will also be required for rapid ciliary elongation induced by lithium.  
254 Chemical inhibition of the Arp2/3 complex with the small molecule inhibitor CK-666 resulted in  
255 defective ciliary elongation in lithium (**Figure 6A-B**). We confirmed this result with genetic  
256 inhibition of the Arp2/3 complex component ARPC4 using an *arpc4* mutant first described in  
257 Bigge et al. 2020 (**Figure 6C-E**). This suggests the Arp2/3 complex is required for lithium-induced  
258 ciliary elongation.

259           To confirm that this requirement of the Arp2/3 complex is connected to the inhibition of  
260 GSK3, we also treated wild-type and *arpc4* mutant cells with CHIR99021, BIO, and Tideglusib. In  
261 all cases, wild-type cells were able to elongate while *arpc4* mutant cells either did not elongate  
262 or shortened (**Figure 6G-L**). Thus, the mechanism whereby GSK3 inhibition results in ciliary  
263 elongation requires the Arp2/3 complex.  
264

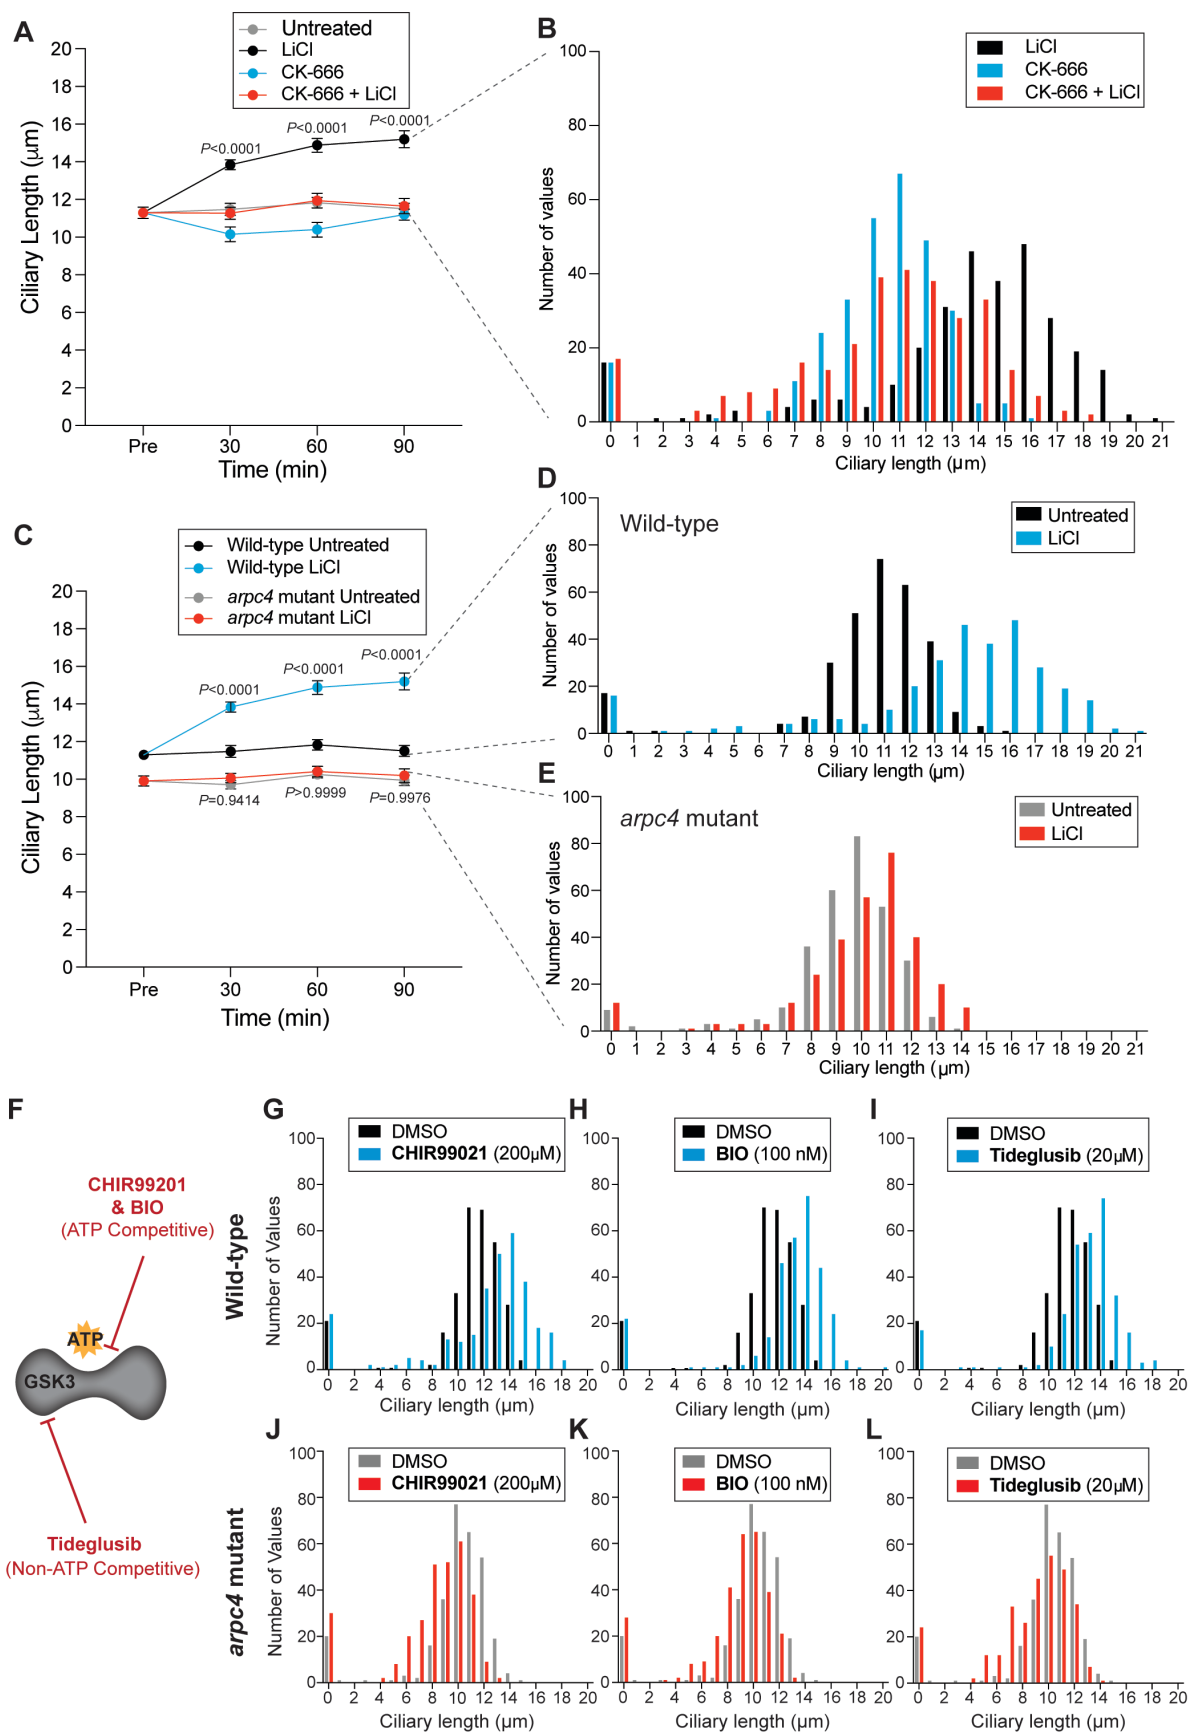

266 **Figure 6. The Arp2/3 complex is required for ciliary elongation induced by GSK3 inhibition.** **A)** Wild-type  
267 (CC-5325) cells were treated with 100  $\mu$ M CK-666 or 100  $\mu$ M CK-666 with 25 mM LiCl. n=30 cells per time  
268 point and sample in 3 separate biological replicates. Significance was determined by one-way ANOVA and a  
269 Tukey's multiple comparisons test. The p values above the lines show the comparison between cells treated  
270 with LiCl and cells treated with LiCl and CK-666. **B)** The 90-minute time point from (A) was expanded to  
271 n=100 cells for each biological replicate. The histograms show distribution of ciliary lengths. **C)** Wild-type (CC-  
272 5325) cells and *arpc4* mutant cells were treated with 25 mM LiCl. n=30 cells per time point and sample in 3  
273 separate biological replicates. Significance was determined by one-way ANOVA and a Tukey's multiple  
274 comparisons test. The p values above the lines show the comparison between wild-type cells treated with  
275 LiCl and *arpc4* mutant cells treated with LiCl. The p values below the lines show the comparison between  
276 untreated *arpc4* mutant cells and *arpc4* mutant cells treated with LiCl. At each time point, this comparison  
277 was not significant. **D-E)** The 90-minute time points from (C) were expanded to n=100 cells for each biological  
278 replicate. (D) represents wild-type cells and (E) represents *arpc4* mutant cells. The histograms show  
279 distribution of ciliary lengths. **F)** Schematic showing GSK3 inhibitory functions of the 3 additional inhibitors.  
280 BIO and CHIR99021 are ATP competitive while Tideglusib is ATP non-competitive. **G-I)** Wild-type cells were  
281 treated with either 200 $\mu$ M CHIR99021 (B), 100nM BIO (C), or 20 $\mu$ M Tideglusib (E) for 90 minutes. Histograms  
282 show distribution of ciliary lengths. n=100 cells in 3 separate biological replicates. **J-L)** *arpc4* mutant cells  
283 were treated with either 200 $\mu$ M CHIR99021 (E), 100nM BIO (F), or 20 $\mu$ M Tideglusib (G) for 90 minutes.  
284 Histograms show distribution of ciliary lengths. n=100 cells in 3 separate biological replicates.  
285  
286

## 287 **DISCUSSION:**

288 In this work, we investigate the mechanisms behind ciliary elongation induced by  
289 lithium treatment in an effort to better understand the factors regulating ciliary length. Cilia are  
290 primarily composed of a microtubule axoneme and a plasma membrane that contains the  
291 axoneme. Many of the studies to understand ciliary length regulation focus on the microtubule  
292 axoneme, the amount of free tubulin available for assembly, and the delivery of tubulin to and  
293 from the ciliary tip through intraflagellar transport (IFT). While these are important factors and  
294 we are interested in how our data can fit with these existing models, we focus instead on the  
295 plasma membrane that ensheathes the axoneme. Because new protein synthesis is not  
296 required for ciliary elongation induced by lithium (Wilson and Lefebvre 2004) (**Supplemental**  
297 **Figure 2**), we hypothesized that the primary source of membrane for elongation was perhaps  
298 separate from the Golgi, which is typically thought to be the primary source of membrane for  
299 ciliary assembly. Previous work has shown that while the Golgi is required for ciliary  
300 maintenance and assembly (Dentler 2013), it is not the only source of membrane. Instead,  
301 membrane reclaimed through actin and Arp2/3-complex dependent endocytosis are required  
302 for ciliary assembly or growth from zero length (Bigge et al. 2020). This led us to question  
303 whether that same mechanism might be required for ciliary elongation from steady state length  
304 induced by lithium treatment.

305 We found that GSK3 inhibition resulted in increased ciliary length using CHIR99021, BIO,  
306 Tideglusib, and Lithium which each target GSK3 through different mechanisms (**Figure 1**).  
307 CHIR99021, BIO, and Tideglusib were designed for use in humans, but their ability to elongate  
308 cilia in *Chlamydomonas* suggests that they are able to target GSK3 ubiquitously and that this  
309 results in ciliary elongation across organisms. Next, we showed that while Golgi-derived  
310 membrane was not required for ciliary lengthening, endocytosis and dynamin function were  
311 needed to elongate cilia (**Figures 2-3**). We could not however rule out other sources of

312 membrane, such as the endosomal network. Finally, we showed that GSK inhibition resulted in  
313 a burst of Arp2/3-complex dependent dots and increased actin dynamics at the membrane  
314 (**Figure 4-5**). These actin dots were previously observed during initial ciliary assembly when  
315 there is a high demand for membrane that can be quickly incorporated into cilia (Bigge et al.  
316 2020). They are reminiscent of endocytic patches or pits seen in yeast where actin is required  
317 for endocytosis to overcome turgor pressure related to the presence of a cell wall, which  
318 *Chlamydomonas* also has (Aghamohammadzadeh and Ayscough 2009; Basu, Munteanu, and  
319 Chang 2014; Carlsson and Bayly 2014) While we cannot say these are *Chlamydomonas*  
320 endocytic pits with the current data, we do believe they speak to the presence of actin  
321 functioning at the membrane during these periods when membrane is in high demand. Finally,  
322 we show that the Arp2/3 complex is absolutely required for lithium-induced ciliary lengthening  
323 from steady state (**Figure 6**), again suggesting an actin- and Arp2/3 complex-dependent process  
324 is required for ciliary elongation. We hypothesize that this Arp2/3 complex-dependent process  
325 is linked to endocytosis, but direct endocytosis during lithium treatment has not been observed  
326 in these cells.

327 Based on our data, we propose a model for lithium induced ciliary elongation were  
328 lithium targets GSK3 which results in a burst of Arp2/3 complex-dependent endocytosis to  
329 reclaim membrane for ciliary lengthening (**Figure 7**). While we made strides toward identifying  
330 the membrane-related targets of GSK3 that result in ciliary elongation, we do not suggest that  
331 this is the only pathway targeted by GSK3 that contributes to ciliary elongation. An interesting  
332 next step would be to further dissect the targets of GSK3 that also contribute to this elongation.  
333 For example, some mechanism must be at play that increases the recruitment of proteins that  
334 compose the axoneme and the IFT machinery. Additionally, it would be interesting to  
335 determine if these phenotypes observed in *Chlamydomonas* are conserved in other organisms  
336 that elongate their cilia in lithium.

337 Finally, because these data are focused on the ciliary membrane instead of the ciliary  
338 axoneme, they provide new insight and lend support to the models of ciliary regulation that  
339 have already been established as follows (Ludington et al. 2015; Avasthi and Marshall 2012;  
340 Ishikawa and Marshall 2017a; Marshall 2015). The limiting-precursor model suggests that cells  
341 make exactly enough ciliary precursor proteins to form cilia of a certain length. However, even  
342 without new protein synthesis cilia are able to grow to half length (Rosenbaum, Moulder, and  
343 Ringo 1969), and in our data, cilia are able to immediately elongate their cilia well beyond  
344 steady-state length when treated with lithium. Therefore, in order for our lithium data and the  
345 regeneration in cycloheximide to fit the limiting pre-cursor model would require additional  
346 mechanisms to allow for growth past 1 cilium length like inhibition of autophagy, sequestration,  
347 and/or degradation during lithium treatment. Alternatively, it is possible that what is limiting  
348 cilium growth is not protein, but membrane, consistent with our data. The time-of-flight model  
349 proposes that there is a degradable signal, like phosphorylation, that is incorporated into IFT  
350 trains that move into the cilia. The longer the IFT trains with the signal are in the cilia, the more  
351 time for the signal to be degraded, thus providing a readout of ciliary length. However, no  
352 active length measurer has been identified (Ishikawa and Marshall 2017b). In lithium treated  
353 cells, where cilia are much longer than usual, the degradable signal would normally be fully  
354 degraded by the time it reached the base of the cilia, but for this model to hold, lithium  
355 treatment would have to interfere with the degradation of this signal. Another model suggests

356 that mechanosensitive ion channels in the ciliary membrane regulate ciliary length because the  
357 longer the cilia is the more ion channels can be present in the membrane and the more ions can  
358 be imported into the cell (Besschetnova et al. 2010; Beck and Uhl 1994). This model is  
359 interesting to consider as lithium itself is an ion,  $\text{Li}^+$ . It is therefore possible that the presence of  
360 lithium interferes with ion balance, such as that of  $\text{Ca}^{2+}$ , to regulate cilium length (Besschetnova  
361 et al. 2010). The swim speed feedback model proposes that the cilia grow to an optimal length  
362 for swimming and that the length therefore depends on fluid forces upon the cilia (D. Tam and  
363 Hosoi 2011; Osterman and Vilfan 2011). Lithium treated cells are unable to swim as their cilia  
364 are not only elongated but also paralyzed (Wilson and Lefebvre 2004; Dentler 2005). This could  
365 affect the sensing of fluid forces in the cilia and cause feedback that could control ciliary length,  
366 although paralyzed flagella mutants do not display elongated cilia, suggesting that should this  
367 model be relevant lithium would have a different mechanism of paralysis. Our data could also  
368 support other models of ciliary length regulation that deal more with the axoneme if lithium is  
369 simultaneously affecting both the membrane and the axoneme. These models include the  
370 tubulin diffusion-based model (Levy 1974; Craft Van De Weghe et al. 2020), the signal diffusion-  
371 based model (Ludington et al. 2015), the kinesin diffusion-based model (Hendel, Thomson, and  
372 Marshall 2018), the molecular ruler model (Marshall 2015), and finally the balance point model,  
373 which considers the constant turnover of tubulin at ciliary tips and the fact that ciliary assembly  
374 is not a linear process, but instead slows as cilia lengthen. This model suggests that there is a  
375 point where the decreasing assembly rate and the constant disassembly rate where cilia reach a  
376 steady state length (Marshall and Rosenbaum 2001; Marshall et al. 2005).

377         Altogether, we show that GSK3 inhibition sparks Arp2/3 complex and actin-dependent  
378 endocytosis to reclaim membrane for ciliary elongation. These data fit well with the some of  
379 the proposed models for ciliary regulation outlined above. Some interesting next steps include  
380 determining other targets of GSK3 inhibition that might contribute to ciliary elongation,  
381 investigating whether this pathway is conserved across organisms as lithium induced ciliary  
382 elongation is, and uncovering new data that might help lithium-induced ciliary lengthening and  
383 our data fit with established and possibly new models of ciliary elongation.

384

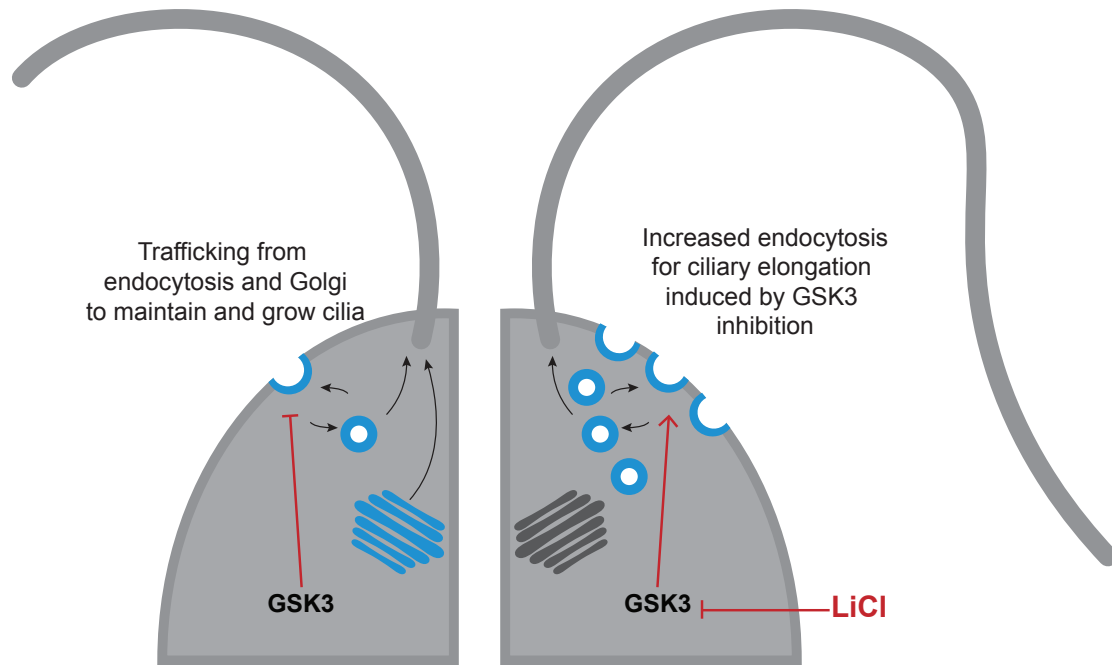

385  
386 **Figure 8. Lithium targets GSK3 which results in a burst of endocytosis to reclaim membrane**  
387 **for ciliary elongation** During normally ciliary maintenance and assembly, Golgi-derived  
388 membrane and some plasma membrane-derived membrane are transported to the cilium.  
389 However, during GSK3 inhibition, there is a burst of endocytic activity that is necessary to  
390 quickly grab membrane for ciliary elongation.

391

392

### 393 **MATERIALS AND METHODS:**

#### 394 *Strains:*

395 The *arpc4* mutant (LMJ.RY0402.232713), *drp3* mutant (LMJ.RY0402.215697), and the wild-type  
396 parent strain (CC-5325) are from the *Chlamydomonas* Resource Center. The *arpc4* mutant was  
397 confirmed previously (Bigge et al. 2020). The *drp3* mutant was confirmed using 2 primer pairs.  
398 The first pair included: AGAAGGCCAGTTTCTCCTCGG and TTAAGCTCGACCTCCCTCAA. The  
399 second pair included: ATAGCCCGCCAAATCAGTCC and ACAGCAACACTGGTACACGC. Cells were  
400 grown and maintained on 1.5% Tris-Acetate Phosphate (TAP) agar plates. Prior to experiments,  
401 liquid TAP cultures were inoculated and grown overnight under constant red and blue light with  
402 agitation.

403

#### 404 *Ciliary studies:*

405 Cells were treated with drugs at specified concentrations: 25 mM LiCl (MP Biomedicals,  
406 194010), 200  $\mu$ M CHIR99021 (Sigma, SML1046), 100  $\mu$ M (2'Z,3'E)-6-Bromoindirubin-3'-oxime  
407 (Sigma, B1686), 20  $\mu$ M Tideglusib (Sigma, SML0339), 10  $\mu$ g/mL Cycloheximide (Sigma, C1988),  
408 100  $\mu$ M CK-666 (Sigma, 182515), 36  $\mu$ M Brefeldin A (Sigma, B7651), and/or 100  $\mu$ M Dynasore  
409 (Sigma, D7693). Cells were incubated with agitation under constant light for the specified times  
410 (usually 30 min, 60 min, and 90 min). Samples were taken prior to the experiment ('Pre') and at



411 each time point by diluting 50  $\mu$ l of cells 1:1 with 2% glutaraldehyde (EMS, 16220) and  
412 incubating at 4°C to allow cells to sediment. Cells were then imaged using a Zeiss AxioScope 5  
413 DIC microscope at 40X (0.75 numerical aperture) and Zeiss Zen 3.1 (blue edition) software. Cilia  
414 were then measured in ImageJ using the segmented line and fit spline functions. One cilium per  
415 cell was measured as the cilia or the same cell should be equivalent lengths.

416

#### 417 *Phalloidin staining:*

418 Procedure was originally published in (Craig and Avasthi 2019). Cells were allowed to adhere to  
419 poly-lysine treated coverslips and then fixed with 4% paraformaldehyde in 1X HEPES. Cells were  
420 then permeabilized with 80% acetone followed by 100% acetone before being allowed to dry  
421 fully. Coverslips rehydrated with PBS were then incubated with Phalloidin-Atto 488 (Sigma,  
422 49409) for 16 minutes before being washed a final time with PBS. Coverslips were dried and  
423 then mounted with Fluoromount-G. Images were acquired using a Nikon Eclipse Ti-E  
424 microscope with a Yokogawa, two-camera CSU0W1 spinning disk system with a 100X oil-  
425 immersion objective lens (1.45 numerical aperture). Z-stacks were obtained using Nikon  
426 Elements. Then, maximum intensity projections were created in ImageJ. The number of cells  
427 with dots and the number of dots per cell were manually counted.

428

#### 429 *Live cell imaging:*

430 The plasmid containing the Lifeact peptide tagged with mNeonGreen, pMO654, was a generous  
431 gift from Masayuki Onishi and is detailed in (Onishi et al. 2019). The plasmid was transformed  
432 into CC-5325 cells using electroporation. Briefly, cells were grown to an OD<sub>730</sub> of 0.3-0.4 in liquid  
433 TAP media, pelleted, washed twice in Max Efficiency Buffer (Thermo), and finally resuspended  
434 to a volume of 250  $\mu$ l Max Efficiency Buffer. This was divided into 2. To each, 1  $\mu$ g of linearized  
435 plasmid was added. Cells with plasmid were incubated for 5 minutes at 4°C. The cells were then  
436 transferred to 4mm electroporation cuvettes. Using a BioRad Gene Pulser XCell set to  
437 exponential decay at 500V, 50  $\mu$ F, and 800 Ohms, cells were electroporated. Following  
438 electroporation, cells were incubated at room temperature for 15 minutes then resuspended in  
439 7 mL of liquid TAP + 40 mM sucrose and incubated overnight in the dark with constant  
440 agitation. The following day, cells were plated on 1.5% TAP plates with the appropriate  
441 selection antibiotic (Paromomycin). Colonies were selected, grown up, and tested by visually  
442 looking for fluorescence.

443

444 For imaging, the same Nikon Spinning Disk microscope described above was used. Cells, either  
445 untreated or immediately following lithium treatment, were imaged every 100 ms for 1 minute  
446 to create time series. The time series were then analyzed in ImageJ/FIJI using the TrackMate  
447 plugin (Tinevez et al. 2017; Ershov et al. 2021). The plugin identifies spots and then tracks their  
448 movement throughout the video. Only the first 300 frames of each image were used to  
449 eliminate concerns of bleaching or cell movement. Estimated object diameter was set to 1  $\mu$ m  
450 and the quality threshold was set to 0.5. To make the colors of the track indicate how many  
451 tracks were present in each cell, they were colored by track ID with the highest track number  
452 value being set to the maximum value and the lowest track number value being set to the  
453 minimum.

454

455 **ACKNOWLEDGEMENTS:**

456 We want to express our appreciation to Masayuki Onishi for generously providing the  
457 Lifeact-mNeonGreen plasmid and the Avasthi lab for help throughout the project. We also want  
458 to thank the BioMT Core at Dartmouth College (NIH/NIGMS COBRE award P20-GM113132), the  
459 Genomics and Molecular Biology Shared Resources Core (NCI Cancer Center Support Grant  
460 5P30CA023108-37), and Ann Lavanway for her help with microscopy. We also thank the  
461 Chlamydomonas Mutant Library Group at Princeton University, the Carnegie Institution for  
462 Science, and the Chlamydomonas Resource Center at the University of Minnesota for providing  
463 the indexed Chlamydomonas insertional mutant(s).

464 Finally, we thank our funding source, the NIGMS MIRA (R35GM128702).

465

466 **REFERENCES:**

- 467 Aghamohammadzadeh, Soheil, and Kathryn R. Ayscough. 2009. "Differential Requirements for  
468 Actin during Yeast and Mammalian Endocytosis." *Nature Cell Biology* 11 (8): 1039–42.  
469 <https://doi.org/10.1038/ncb1918>.
- 470 Asleson, C. M., and P. A. Lefebvre. 1998. "Genetic Analysis of Flagellar Length Control in  
471 Chlamydomonas Reinhardtii: A New Long-Flagella Locus and Extragenic Suppressor  
472 Mutations." *Genetics* 148 (2): 693–702. <https://doi.org/10.1093/genetics/148.2.693>.
- 473 Avasthi, Prachee, and Wallace F Marshall. 2012. "Stages of Ciliogenesis and Regulation of Ciliary  
474 Length." *Differentiation; Research in Biological Diversity* 83 (2): S30–42.  
475 <https://doi.org/10.1016/j.diff.2011.11.015>.
- 476 Barsel, S. E., D. E. Wexler, and P. A. Lefebvre. 1988. "Genetic Analysis of Long-Flagella Mutants  
477 of Chlamydomonas Reinhardtii." *Genetics* 118 (4): 637–48.  
478 <https://doi.org/10.1093/genetics/118.4.637>.
- 479 Basu, Roshni, Emilia Laura Munteanu, and Fred Chang. 2014. "Role of Turgor Pressure in  
480 Endocytosis in Fission Yeast." *Molecular Biology of the Cell* 25 (5): 679–87.  
481 <https://doi.org/10.1091/mbc.E13-10-0618>.
- 482 Beck, Christina, and Rainer Uhl. 1994. "On the Localization of Voltage-Sensitive Calcium  
483 Channels in the Flagella of Chlamydomonas Reinhardtii." *The Journal of Cell Biology* 125  
484 (5): 1119–25.
- 485 Besschetnova, Tatiana Y, Elona Kolpakova-Hart, Yinghua Guan, Jing Zhou, Bjorn R Olsen, and  
486 Jagesh V Shah. 2010. "Identification of Signaling Pathways Regulating Primary Cilium  
487 Length and Flow-Mediated Adaptation." *Current Biology* 20 (2): 182–87.
- 488 Bigge, Brae M, Nicholas E Rosenthal, David Sept, Courtney M Schroeder, and Prachee Avasthi.  
489 2020. "Initial Ciliary Assembly in Chlamydomonas Requires Arp2/3-  
490 Dependent Recruitment from a Ciliary Protein Reservoir in the Plasma Membrane."  
491 *BioRxiv*, January, 2020.11.24.396002. <https://doi.org/10.1101/2020.11.24.396002>.
- 492 Carlsson, Anders E., and Philip V. Bayly. 2014. "Force Generation by Endocytic Actin Patches in  
493 Budding Yeast." *Biophysical Journal* 106 (8): 1596–1606.  
494 <https://doi.org/10.1016/j.bpj.2014.02.035>.
- 495 Cheng, Xi, Gai Liu, Wenting Ke, Lijuan Zhao, Bo Lv, Xiaocui Ma, Nannan Xu, et al. 2017. "Building  
496 a Multipurpose Insertional Mutant Library for Forward and Reverse Genetics in  
497 Chlamydomonas." *Plant Methods* 13 (1): 36. [https://doi.org/10.1186/s13007-017-0183-](https://doi.org/10.1186/s13007-017-0183-5)  
498 5.

- 499 Craft Van De Weghe, Julie, J. Aaron Harris, Tomohiro Kubo, George B. Witman, and Karl F.  
500 Lehtreck. 2020. "Diffusion Rather than Intraflagellar Transport Likely Provides Most of  
501 the Tubulin Required for Axonemal Assembly in *Chlamydomonas*." *Journal of Cell*  
502 *Science* 133 (17). <https://doi.org/10.1242/jcs.249805>.
- 503 Craig, Evan W., and Prachee Avasthi. 2019. "Visualizing Filamentous Actin Using Phalloidin in  
504 *Chlamydomonas Reinhardtii*." *Bio-Protocol* 9 (12).  
505 <https://doi.org/10.21769/BioProtoc.3274>.
- 506 Dentler, William. 2005. "Intraflagellar Transport (IFT) during Assembly and Disassembly of  
507 *Chlamydomonas* Flagella." *The Journal of Cell Biology* 170 (4): 649–59.  
508 <https://doi.org/10.1083/jcb.200412021>.
- 509 ———. 2013. "A Role for the Membrane in Regulating *Chlamydomonas* Flagellar Length." *PLOS*  
510 *ONE* 8 (1): e53366. <https://doi.org/10.1371/journal.pone.0053366>.
- 511 Elde, Nels C, Garry Morgan, Mark Winey, Linda Sperling, and Aaron P Turkewitz. 2005.  
512 "Elucidation of Clathrin-Mediated Endocytosis in *Tetrahymena* Reveals an Evolutionarily  
513 Convergent Recruitment of Dynamin." *PLOS Genetics* 1 (5): e52.  
514 <https://doi.org/10.1371/journal.pgen.0010052>.
- 515 Ershov, Dmitry, Minh-Son Phan, Joanna W. Pylvänäinen, Stéphane U. Rigaud, Laure Le Blanc,  
516 Arthur Charles-Orszag, James R. W. Conway, et al. 2021. "Bringing TrackMate into the  
517 Era of Machine-Learning and Deep-Learning." *BioRxiv*, January, 2021.09.03.458852.  
518 <https://doi.org/10.1101/2021.09.03.458852>.
- 519 Hendel, Nathan L., Matthew Thomson, and Wallace F. Marshall. 2018. "Diffusion as a Ruler:  
520 Modeling Kinesin Diffusion as a Length Sensor for Intraflagellar Transport." *Biophysical*  
521 *Journal* 114 (3): 663–74. <https://doi.org/10.1016/j.bpj.2017.11.3784>.
- 522 Ishikawa, Hiroaki, and Wallace F. Marshall. 2017a. "Intraflagellar Transport and Ciliary  
523 Dynamics." *Cold Spring Harbor Perspectives in Biology* 9 (3).  
524 <https://doi.org/10.1101/cshperspect.a021998>.
- 525 ———. 2017b. "Testing the Time-of-Flight Model for Flagellar Length Sensing." *Molecular*  
526 *Biology of the Cell* 28 (23): 3447–56. <https://doi.org/10.1091/mbc.e17-06-0384>.
- 527 Jack, Brittany, and Prachee Avasthi. 2018. "Erratum to: Chemical Screening for Flagella-  
528 Associated Phenotypes in *Chlamydomonas Reinhardtii*." *Methods in Molecular Biology*  
529 (*Clifton, N.J.*) 1795: E1. [https://doi.org/10.1007/978-1-4939-7874-8\\_19](https://doi.org/10.1007/978-1-4939-7874-8_19).
- 530 JARVIK, JONATHAN W., FREDERICK D. REINHART, MICHAEL R. KUCHKA, and SALLY A. ADLER.  
531 1984. "Altered Flagellar Size-control in Shf-1 Short-flagella Mutants of *Chlamydomonas*  
532 *Reinhardtii*." *The Journal of Protozoology* 31 (2): 199–204.
- 533 Kong, Ji Na, Kara Hardin, Michael Dinkins, Guanghu Wang, Qian He, Tarik Mujadzic, Gu Zhu,  
534 Jacek Bielawski, Stefka Spassieva, and Erhard Bieberich. 2015. "Regulation of  
535 *Chlamydomonas* Flagella and Ependymal Cell Motile Cilia by Ceramide-Mediated  
536 Translocation of GSK3." *Molecular Biology of the Cell* 26 (24): 4451–65.  
537 <https://doi.org/10.1091/mbc.E15-06-0371>.
- 538 Laiman, Jessica, Julie Loh, Wei-Chun Tang, Mei-Chun Chuang, Hui-Kang Liu, Bi-Chang Chen, Yi-  
539 Cheng Chang, Lee-Ming Chuang, and Ya-Wen Liu. 2021. "Dynamin-2 Phosphorylation as  
540 A Critical Regulatory Target of Bin1 and GSK3 $\alpha$  for Endocytosis in Muscle." *BioRxiv*,  
541 January, 2021.10.11.463889. <https://doi.org/10.1101/2021.10.11.463889>.

- 542 Lefebvre, P. A., S. A. Nordstrom, J. E. Moulder, and J. L. Rosenbaum. 1978. "Flagellar Elongation  
543 and Shortening in Chlamydomonas. IV. Effects of Flagellar Detachment, Regeneration,  
544 and Resorption on the Induction of Flagellar Protein Synthesis." *The Journal of Cell  
545 Biology* 78 (1): 8–27. <https://doi.org/10.1083/jcb.78.1.8>.
- 546 Lefebvre, Paul A. 1995. "Flagellar Amputation and Regeneration in Chlamydomonas." In  
547 *Methods in Cell Biology*, 47:3–7. Elsevier.
- 548 Levy, Elinor Miller. 1974. "Flagellar Elongation as a Moving Boundary Problem." *Bulletin of  
549 Mathematical Biology* 36: 265–73.
- 550 Li, Xiaobo, Weronika Patena, Friedrich Fauser, Robert E. Jinkerson, Shai Saroussi, Moritz T.  
551 Meyer, Nina Ivanova, et al. 2019. "A Genome-Wide Algal Mutant Library and Functional  
552 Screen Identifies Genes Required for Eukaryotic Photosynthesis." *Nature Genetics* 51  
553 (4): 627–35. <https://doi.org/10.1038/s41588-019-0370-6>.
- 554 Ludington, William B., Hiroaki Ishikawa, Yevgeniy V. Serebrenik, Alex Ritter, Rogelio A.  
555 Hernandez-Lopez, Julia Gunzenhauser, Elisa Kannegaard, and Wallace F. Marshall. 2015.  
556 "A Systematic Comparison of Mathematical Models for Inherent Measurement of Ciliary  
557 Length: How a Cell Can Measure Length and Volume." *Biophysical Journal* 108 (6): 1361–  
558 79. <https://doi.org/10.1016/j.bpj.2014.12.051>.
- 559 Marshall, Wallace F. 2015. "How Cells Measure Length on Subcellular Scales." *Special Issue:  
560 Quantitative Cell Biology* 25 (12): 760–68. <https://doi.org/10.1016/j.tcb.2015.08.008>.
- 561 Marshall, Wallace F, Hongmin Qin, Mónica Rodrigo Brenni, and Joel L Rosenbaum. 2005.  
562 "Flagellar Length Control System: Testing a Simple Model Based on Intraflagellar  
563 Transport and Turnover." *Molecular Biology of the Cell* 16 (1): 270–78.  
564 <https://doi.org/10.1091/mbc.e04-07-0586>.
- 565 Marshall, Wallace F., and Joel L. Rosenbaum. 2001. "Intraflagellar Transport Balances  
566 Continuous Turnover of Outer Doublet Microtubules: Implications for Flagellar Length  
567 Control." *The Journal of Cell Biology* 155 (3): 405–14.
- 568 Miki, Daisuke, Yuki Kobayashi, Tomoya Okada, Tatuso Miyamoto, Nobuyuki Takei, Yuko Sekino,  
569 Noriko Koganezawa, Tomoaki Shirao, and Yumiko Saito. 2019. "Characterization of  
570 Functional Primary Cilia in Human Induced Pluripotent Stem Cell-Derived Neurons."  
571 *Neurochemical Research* 44 (7): 1736–44. <https://doi.org/10.1007/s11064-019-02806-4>.
- 572 Miyoshi, Ko, Kyosuke Kasahara, Ikuko Miyazaki, and Masato Asanuma. 2009. "Lithium  
573 Treatment Elongates Primary Cilia in the Mouse Brain and in Cultured Cells."  
574 *Biochemical and Biophysical Research Communications* 388 (4): 757–62.  
575 <https://doi.org/10.1016/j.bbrc.2009.08.099>.
- 576 Nachury, Maxence V., E. Scott Seeley, and Hua Jin. 2010. "Trafficking to the Ciliary Membrane:  
577 How to Get across the Periciliary Diffusion Barrier?" *Annual Review of Cell and  
578 Developmental Biology* 26: 59–87.  
579 <https://doi.org/10.1146/annurev.cellbio.042308.113337>.
- 580 Nakamura, Shogo, Hiroyoshi Takino, and Manabu K. Kojima. 1987. "Effect of Lithium on  
581 Flagellar Length in Chlamydomonas Reinhardtii." *Cell Structure and Function* 12 (4):  
582 369–74. <https://doi.org/10.1247/csf.12.369>.
- 583 Nguyen, Rachel L., Lai-Wa Tam, and Paul A. Lefebvre. 2005. "The LF1 Gene of Chlamydomonas  
584 Reinhardtii Encodes a Novel Protein Required for Flagellar Length Control." *Genetics* 169  
585 (3): 1415–24. <https://doi.org/10.1534/genetics.104.027615>.

- 586 Onishi, Masayuki, James G. Umen, Frederick R. Cross, and John R. Pringle. 2019. "Cleavage-  
587 Furrow Formation without F-Actin in *Chlamydomonas*." *BioRxiv*, January,  
588 789016. <https://doi.org/10.1101/789016>.
- 589 Osterman, Natan, and Andrej Vilfan. 2011. "Finding the Ciliary Beating Pattern with Optimal  
590 Efficiency." *Proceedings of the National Academy of Sciences* 108 (38): 15727–32.
- 591 Ou, Young, Camila Dores, Jose-Rafael Rodriguez-Sosa, Frans A. van der Hoorn, and Ina  
592 Dobrinski. 2014. "Primary Cilia in the Developing Pig Testis." *Cell and Tissue Research*  
593 358 (2): 597–605. <https://doi.org/10.1007/s00441-014-1973-y>.
- 594 Ou, Young, Yibing Ruan, Min Cheng, Joanna J Moser, Jerome B Rattner, and Frans A van der  
595 Hoorn. 2009. "Adenylate Cyclase Regulates Elongation of Mammalian Primary Cilia."  
596 *Experimental Cell Research* 315 (16): 2802–17.  
597 <https://doi.org/10.1016/j.yexcr.2009.06.028>.
- 598 Ou, Young, Ying Zhang, Min Cheng, Jerome B. Rattner, Ina Dobrinski, and Frans A. van der  
599 Hoorn. 2012. "Targeting of CRMP-2 to the Primary Cilium Is Modulated by GSK-3 $\beta$ ." *PloS*  
600 *One* 7 (11): e48773. <https://doi.org/10.1371/journal.pone.0048773>.
- 601 Reiter, Jeremy F., and Michel R. Leroux. 2017. "Genes and Molecular Pathways Underpinning  
602 Ciliopathies." *Nature Reviews Molecular Cell Biology* 18 (9): 533–47.  
603 <https://doi.org/10.1038/nrm.2017.60>.
- 604 Rohatgi, Rajat, and William J Snell. 2010. "The Ciliary Membrane." *Current Opinion in Cell*  
605 *Biology* 22 (4): 541–46. <https://doi.org/10.1016/j.ceb.2010.03.010>.
- 606 Rosenbaum, J. L., J. E. Moulder, and D. L. Ringo. 1969. "Flagellar Elongation and Shortening in  
607 *Chlamydomonas*. The Use of Cycloheximide and Colchicine to Study the Synthesis and  
608 Assembly of Flagellar Proteins." *The Journal of Cell Biology* 41 (2): 600–619.  
609 <https://doi.org/10.1083/jcb.41.2.600>.
- 610 Smillie, Karen J., and Michael A. Cousin. 2012. "Akt/PKB Controls the Activity-Dependent Bulk  
611 Endocytosis of Synaptic Vesicles." *Traffic (Copenhagen, Denmark)* 13 (7): 1004–11.  
612 <https://doi.org/10.1111/j.1600-0854.2012.01365.x>.
- 613 Soave, Arianna, Loraine L. Y. Chiu, Aisha Momin, and Stephen D. Waldman. 2022. "Lithium  
614 Chloride-Induced Primary Cilia Recovery Enhances Biosynthetic Response of  
615 Chondrocytes to Mechanical Stimulation." *Biomechanics and Modeling in*  
616 *Mechanobiology*, January. <https://doi.org/10.1007/s10237-021-01551-4>.
- 617 Srinivasan, Saipraveen, Christoph J. Burckhardt, Madhura Bhawe, Zhiming Chen, Ping-Hung  
618 Chen, Xinxin Wang, Gaudenz Danuser, and Sandra L. Schmid. 2018. "A Noncanonical  
619 Role for Dynamin-1 in Regulating Early Stages of Clathrin-Mediated Endocytosis in Non-  
620 Neuronal Cells." *PLOS Biology* 16 (4): e2005377.  
621 <https://doi.org/10.1371/journal.pbio.2005377>.
- 622 Tam, Daniel, and AE Hosoi. 2011. "Optimal Feeding and Swimming Gaits of Biflagellated  
623 Organisms." *Proceedings of the National Academy of Sciences* 108 (3): 1001–6.
- 624 Tam, Lai-Wa, Nedra F. Wilson, and Paul A. Lefebvre. 2007. "A CDK-Related Kinase Regulates the  
625 Length and Assembly of Flagella in *Chlamydomonas*." *The Journal of Cell Biology* 176 (6):  
626 819–29. <https://doi.org/10.1083/jcb.200610022>.
- 627 Thompson, Clare L., Anna Wiles, C. Anthony Poole, and Martin M. Knight. 2016. "Lithium  
628 Chloride Modulates Chondrocyte Primary Cilia and Inhibits Hedgehog Signaling." *FASEB*

629 *Journal : Official Publication of the Federation of American Societies for Experimental*  
630 *Biology* 30 (2): 716–26. <https://doi.org/10.1096/fj.15-274944>.  
631 Tinevez, Jean-Yves, Nick Perry, Johannes Schindelin, Genevieve M. Hoopes, Gregory D.  
632 Reynolds, Emmanuel Laplantine, Sebastian Y. Bednarek, Spencer L. Shorte, and Kevin W.  
633 Eliceiri. 2017. “TrackMate: An Open and Extensible Platform for Single-Particle  
634 Tracking.” *Image Processing for Biologists* 115 (February): 80–90.  
635 <https://doi.org/10.1016/j.ymeth.2016.09.016>.  
636 Wilson, Nedra F, and Paul A Lefebvre. 2004. “Regulation of Flagellar Assembly by Glycogen  
637 Synthase Kinase 3 in *Chlamydomonas Reinhardtii*.” *Eukaryotic Cell* 3 (5): 1307–19.  
638 <https://doi.org/10.1128/EC.3.5.1307-1319.2004>.

639  
640  
641  
642  
643

### SUPPLEMENTAL MATERIAL:

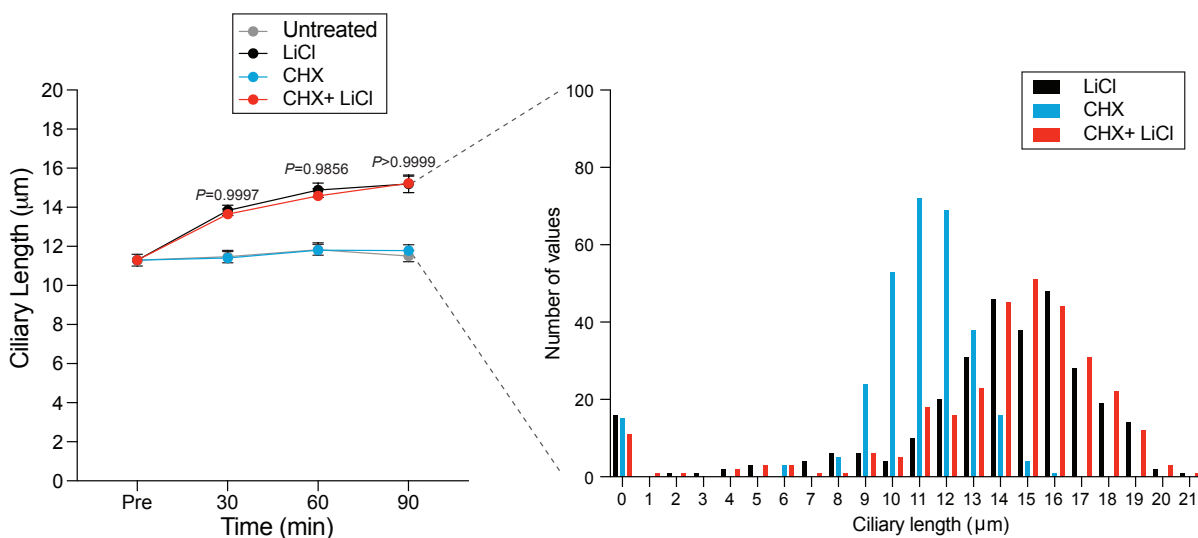

644 **Supplemental Figure 1. New protein synthesis is not required for lithium-induced ciliary elongation. A)**  
645 Wild-type cells were treated with either 25 mM LiCl, 10  $\mu$ M Cycloheximide (CHX), or a combination of the  
646 two drugs. n=30 for each sample at each time point in 3 separate biological replicates. Significance was  
647 determined by one-way ANOVA and a Tukey’s multiple comparisons test. The p values above the lines show  
648 the comparison between cells treated with LiCl alone or LiCl and CHX. In all cases, the comparison is not  
649 significant. **B)** A histogram representation of the 90-minute time point from (A). For this, n=100 for each  
650 sample in 3 separate biological replicates (300 total points).

651  
652  
653  
654

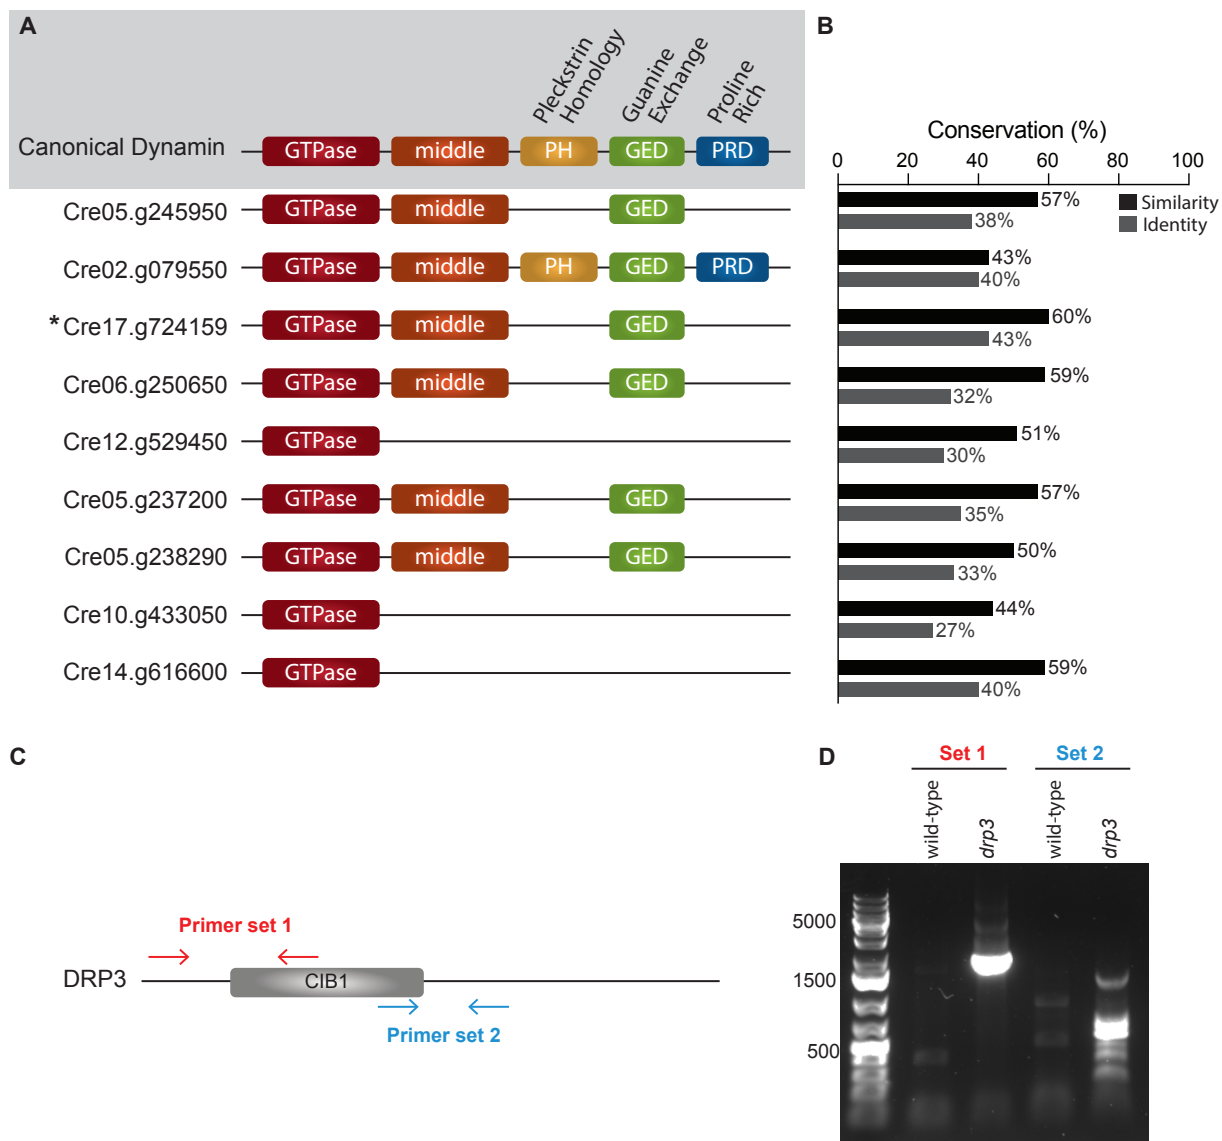

655  
 656 **Supplemental Figure 2. *Chlamydomonas* contains several dynamin related proteins (DRPs) with the most**  
 657 **similar to canonical dynamin being DRP3 (Cre17.g724159) A)** The canonical dynamin contains 5 domains  
 658 represented in different colors above. The *Chlamydomonas* genome contains no conventional dynamins but  
 659 does contain 9 dynamin related proteins (DRPs) that have various similarities compared with canonical  
 660 dynamin. The *Chlamydomonas* DRPs above are represented by the gene identifier and are ordered by DRP  
 661 number (the first is DRP1, the second is DRP2, etc). **B)** The graph on the right shows the similarity and identity  
 662 of each DRP compared to canonical mammalian dynamin as determined by MUSCLE alignment. The DRP that  
 663 is the most closely related to canonical dynamin is DRP3, Cre17.g724159. **C)** Schematic of the DRP3 genomic  
 664 sequence with the primers used to confirm mutation represented by arrows. **D)** DNA gel electrophoresis  
 665 showing resulting DNA sequences from the PCR using the primer sets shown in C.

666  
 667  
 668
